# Supplementary material
Source: PubMed Central journal article supplement (PMC6938237)

Supplementary Fig. 1

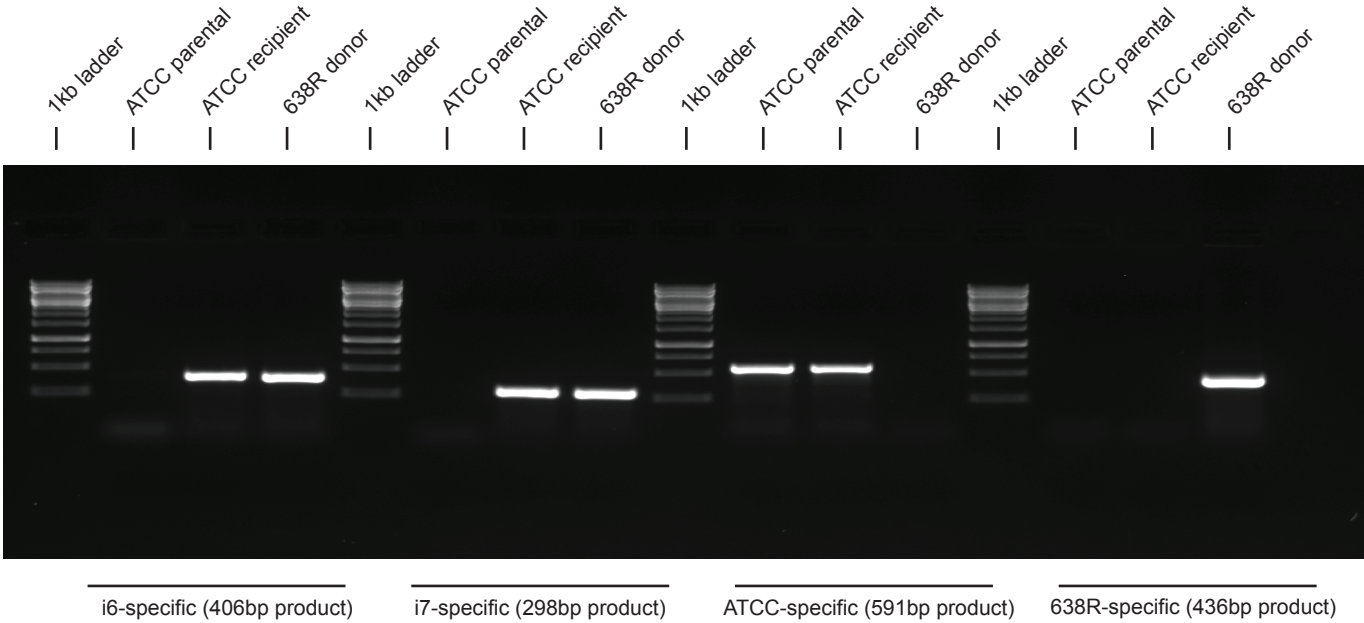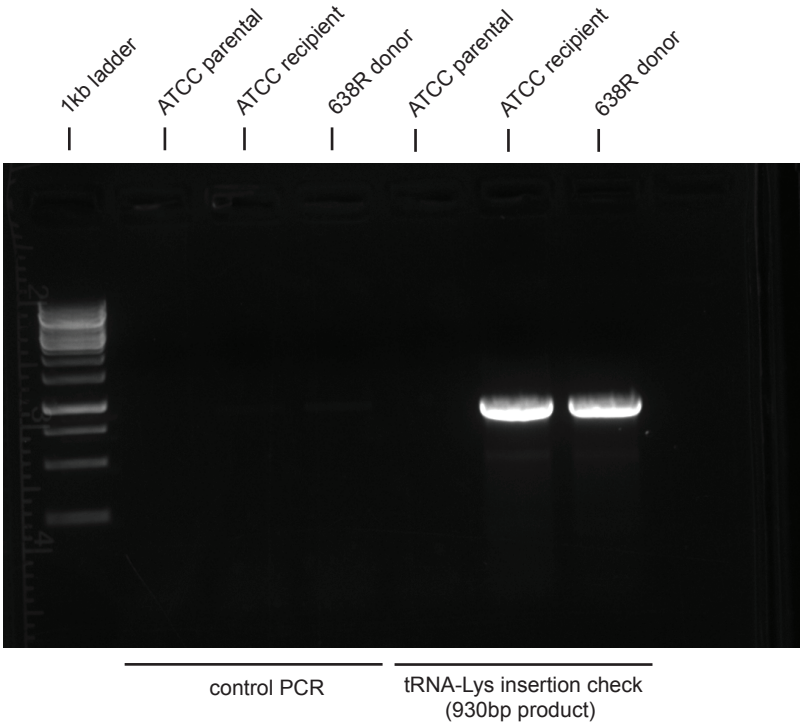

Supplement: NIHMS1540454-supplement-Supplementary_Figure.pdf [file NIHMS1540454-supplement-Supplementary_Figure.pdf]
